# Supplementary material for: Exploring the effects of mental health on bonding and caregiving among pregnant and postpartum persons with likely depression and/or PTSD in South Africa: A qualitative analysis
Source: PubMed Central journal article supplement (PMC11537343; doi:10.21203/rs.3.rs-5041479/v1), 2024-10-24
Supplement: NIHPPRS5041479V1-supplement-1.pdf [file NIHPPRS5041479V1-supplement-1.pdf]

## Supplementary Files

This is a list of supplementary files associated with this preprint. Click to download.

- [Additionalfile1.pdf](#)
